# Supplementary material for: Experiences of Patients Undergoing Chemotherapy With Virtual Reality: Mixed Methods Feasibility Study
Source: PubMed Central journal article supplement (PMC8902671; doi:10.2196/29579), 2022-02-21
Supplement: games_v10i1e29579_app1.pdf [file games_v10i1e29579_app1.pdf]

**Post-Intervention Survey**

|                                                                              | Strongly Disagree                                        |   |   |   |   |   | Strongly Agree |
|------------------------------------------------------------------------------|----------------------------------------------------------|---|---|---|---|---|----------------|
| <b><u>Interest/Enjoyment</u></b>                                             | 1                                                        | 2 | 3 | 4 | 5 | 6 | 7              |
| I enjoyed doing this activity very much.                                     |                                                          |   |   |   |   |   |                |
| This activity was fun to do.                                                 |                                                          |   |   |   |   |   |                |
| I thought this was a boring activity.                                        |                                                          |   |   |   |   |   |                |
| This activity did not hold my attention at all.                              |                                                          |   |   |   |   |   |                |
| I would describe this activity as very interesting.                          |                                                          |   |   |   |   |   |                |
| I thought this activity was quite enjoyable.                                 |                                                          |   |   |   |   |   |                |
| While I was doing this activity, I was thinking about how much I enjoyed it. |                                                          |   |   |   |   |   |                |
| <b><u>Future Participation</u></b>                                           | 1                                                        | 2 | 3 | 4 | 5 | 6 | 7              |
| I would be open to trying VR again in future                                 |                                                          |   |   |   |   |   |                |
| <b><u>Motion Sickness</u></b>                                                |                                                          |   |   |   |   |   |                |
| Did you experience motion sickness during virtual reality session?           | <input type="checkbox"/> Yes <input type="checkbox"/> No |   |   |   |   |   |                |
