# Supplementary material for: Experiences of Patients Undergoing Chemotherapy With Virtual Reality: Mixed Methods Feasibility Study
Source: PubMed Central journal article supplement (PMC8902671; doi:10.2196/29579), 2022-02-21
Supplement: games_v10i1e29579_app2.pdf [file games_v10i1e29579_app2.pdf]

The use of an adverse event checklist that allowed participants to visually indicate any adverse events experienced.

Please mark on these pictures where it is you hurt.

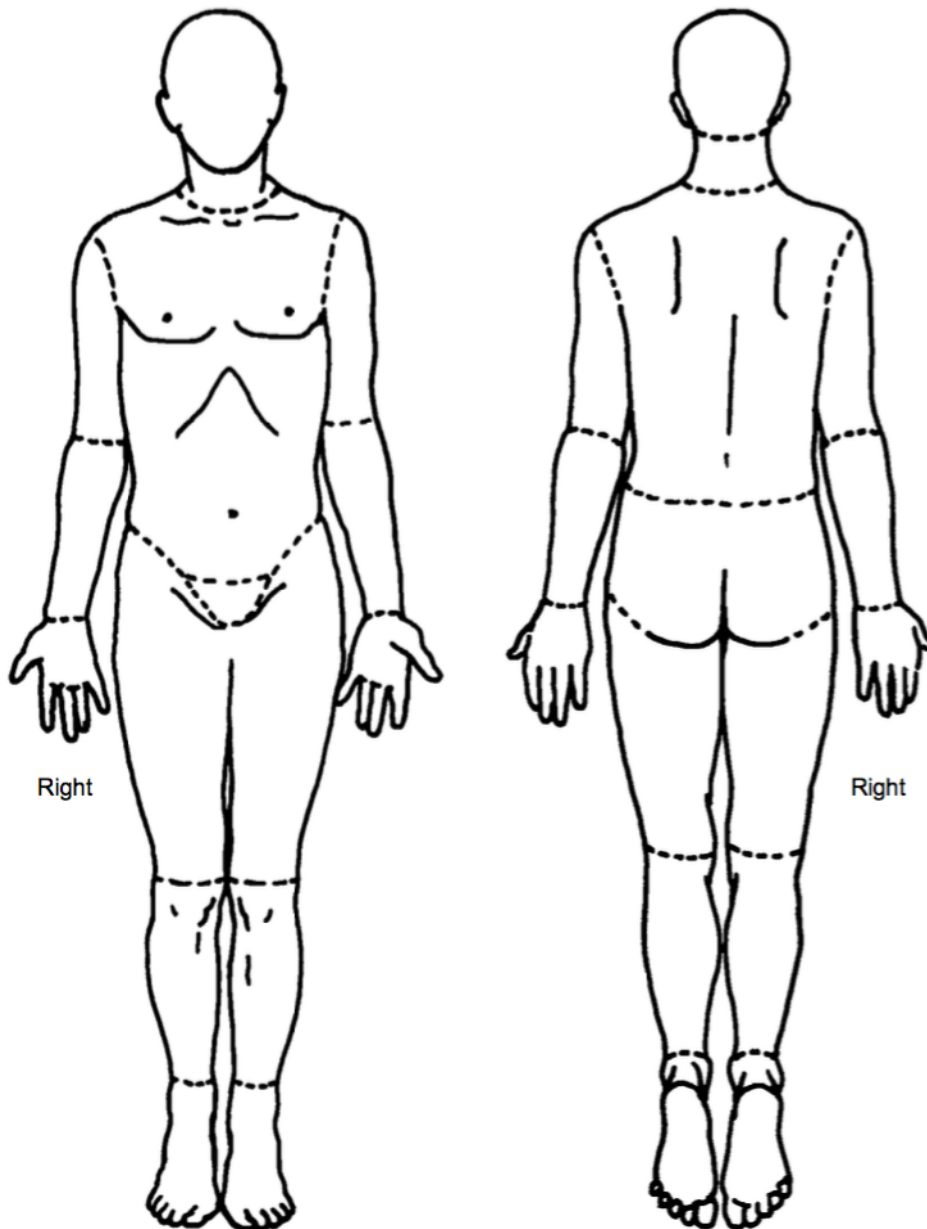

**Adverse event checklist**

**Other information:**

---

---

---
